# Supplementary material for: Propofol adsorption at the air/water interface: a combined vibrational sum frequency spectroscopy, nuclear magnetic resonance and neutron reflectometry study
Source: Royal Society of Chemistry journal article supplement (doi:10.1039/c8sm01677a), 2018-11-08
Supplement: c8sm01677a1.pdf [file c8sm01677a1.pdf]

# Propofol adsorption at the air/water interface: a combined vibrational sum frequency spectroscopy, nuclear magnetic resonance and neutron reflectometry study.

*Petru Niga<sup>1\*</sup>, Petra M. Hansson-Mille<sup>1</sup>, Agne Swerin<sup>1,2</sup>, Per M. Claesson<sup>1,2</sup>, Joachim  
Schoelkopf<sup>3</sup>, Patrick A. C. Gane<sup>3,4</sup>, Jing Dai<sup>5</sup>, István Furó<sup>5</sup>, Richard A. Campbell<sup>6,7</sup>  
and C. Magnus Johnson<sup>2\*</sup>*

<sup>1</sup>RISE Research Institutes of Sweden – Chemistry, Materials and Surfaces, Box 5607, SE-114 86 Stockholm, Sweden.

<sup>2</sup>KTH Royal Institute of Technology, Department of Chemistry, Division of Surface and Corrosion Science, SE - 100 44 Stockholm, Sweden.

<sup>3</sup>Omya International AG, Baslerstrasse 42, CH-4665 Oftringen, Switzerland.

<sup>4</sup>Aalto University, School of Chemical Technology, Department of Bioproducts and Biosystems, FI-00076 Aalto, Helsinki, Finland.

<sup>5</sup>KTH Royal Institute of Technology, Department of Chemistry, Division of Applied Physical Chemistry, SE - 100 44 Stockholm, Sweden.

<sup>6</sup>Institut Laue-Langevin, 71 Avenue des Martyrs, CS20156, 38042 Grenoble Cedex 9, France.

<sup>7</sup>Division of Pharmacy and Optometry, University of Manchester, Manchester M13 9PT, UK.

## Supporting Information

### Fitting of the propofol spectrum at 0.89 mM concentration

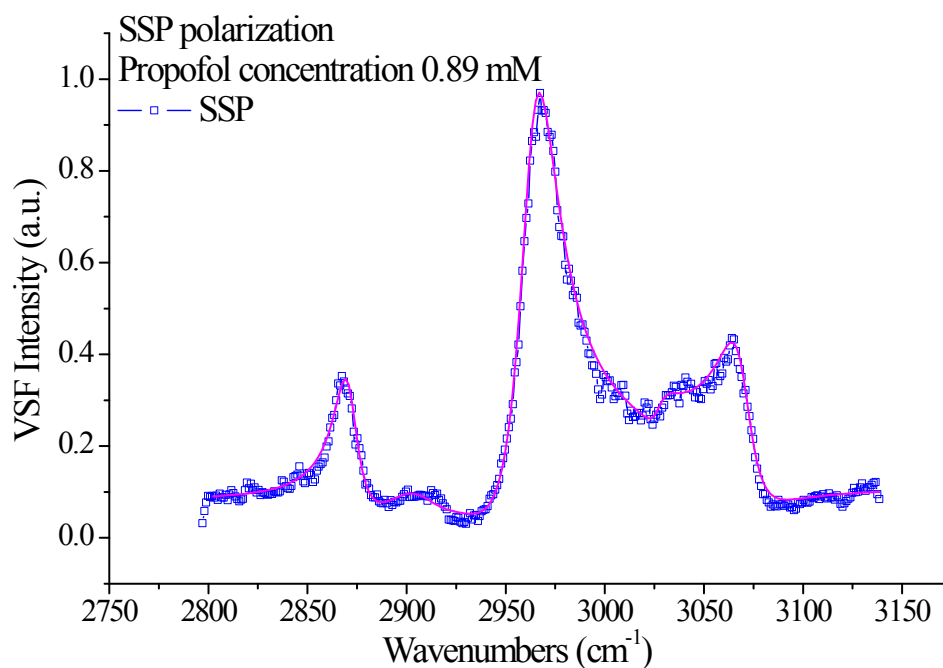

Figure S1. VSF spectra for propofol at a concentration of 0.89 mM in SSP polarization including the fitting curve.

Table S1. Fitting parameters for CH stretches of propofol at increasing concentrations

| Concentration mM | Assignments      | Peak position | Amplitude | Gamma |
|------------------|------------------|---------------|-----------|-------|
| SSP              |                  |               |           |       |
| 0.22             | sCH <sub>3</sub> | 2875          | 0.154     | 9     |
|                  | CH isoprop.      | 2910          | 0.114     | 14    |
|                  | aCH <sub>3</sub> | 2965          | -0.349    | 12    |
|                  | arCH             | 3035          | -0.047    | 11    |
|                  | arCH             | 3071          | 0.010     | 11    |
| SSP              |                  |               |           |       |
| 0.28             | sCH <sub>3</sub> | 2875          | 0.162     | 9     |
|                  | CH isoprop.      | 2910          | 0.063     | 14    |
|                  | aCH <sub>3</sub> | 2965          | -0.410    | 12    |
|                  | arCH             | 3035          | -0.002    | 11    |
|                  | arCH             | 3071          | 0.002     | 11    |

|      |                  |      |        |    |
|------|------------------|------|--------|----|
| SSP  |                  |      |        |    |
| 0.39 | sCH <sub>3</sub> | 2875 | 0.207  | 9  |
|      | CH isoprop.      | 2910 | 0,032  | 14 |
|      | aCH <sub>3</sub> | 2965 | -0.484 | 12 |
|      | arCH             | 3035 | -0,018 | 13 |
|      | arCH             | 3071 | 0,022  | 11 |
| SSP  |                  |      |        |    |
| 0.56 | sCH <sub>3</sub> | 2875 | 0.189  | 9  |
|      | CH isoprop.      | 2910 | 0,176  | 14 |
|      | aCH <sub>3</sub> | 2965 | -0.524 | 12 |
|      | arCH             | 3035 | -0.062 | 11 |
|      | arCH             | 3071 | 0.070  | 11 |
| SSP  |                  |      |        |    |
| 0.73 | sCH <sub>3</sub> | 2875 | 0,213  | 9  |
|      | CH isoprop.      | 2910 | 0,152  | 14 |
|      | aCH <sub>3</sub> | 2965 | -0,526 | 12 |
|      | arCH             | 3035 | -0,038 | 11 |
|      | arCH             | 3071 | 0,139  | 11 |
| SSP  |                  |      |        |    |
| 0.89 | sCH <sub>3</sub> | 2875 | 0,212  | 9  |
|      | CH isoprop.      | 2910 | 0,128  | 14 |
|      | aCH <sub>3</sub> | 2965 | -0,547 | 12 |
|      | arCH             | 3035 | -0.018 | 11 |
|      | arCH             | 3071 | 0.162  | 11 |

### Details on the derivation of the area per molecule from the surface tension measurements.

The data of the surface tension isotherm was fitted using a second order polynomial function as shown below:

$$y = B1 \cdot x + B2 \cdot x^2 + C$$

where  $x = \ln(c)$  and  $C$  is the intercept.

| B1      |                | B2    |                | C     |                | Statistics    |
|---------|----------------|-------|----------------|-------|----------------|---------------|
| Value   | Standard Error | Value | Standard Error | Value | Standard Error | Adj. R-Square |
| -21.071 | 1.023          | 5.529 | 0.921          | 72    | 0.226          | 0.998         |

We have used a common approach to place the interfacial plane so that the surface excess of water is zero and the surface excess of propofol as determined from surface tensiometry,  $\Gamma_{ST}$ , is calculated as follows:<sup>S11</sup>

$$\frac{d\gamma}{d\mu} = -\Gamma_{ST}$$

where  $\gamma$  is the surface tension, and  $\mu$  is the chemical potential of propofol, which can be expressed as

$$\mu = \mu^0 + RT \ln a \approx \mu^0 + RT \ln c$$

where  $\mu^0$  is the chemical potential of pure water, and  $a$  is the activity and  $c$  the bulk concentration of propofol.  $\Gamma_{ST}$  was calculated based on Gibb's equation:

$$\Gamma_{ST} = -\frac{1}{RT} \frac{d\gamma}{d \ln c}$$

where  $R$  is the gas constant, and  $T$  is the absolute temperature. To calculate the derivative, the second order polynomial that was fitted to the data was used. The values of the area per molecule,  $A$ , reported in main text were calculated from the following relation

$$A = 1/(\Gamma_{ST} N_A)$$

where  $N_A$  is Avogadro's number.

## Reference

SI1. D. Fennell Evans, H. W. (1999). The Colloidal Domain: Where Physics, Chemistry, Biology, and Technology Meet.
